# Supplementary material for: A method of quantifying centrosomes at the single-cell level in human normal and cancer tissue
Source: PubMed Central journal article supplement — Mol Biol Cell. 2019 Mar 21;30(7):811–9. doi: 10.1091/mbc.E18-10-0651 (PMC6589791; doi:10.1091/mbc.e18-10-0651), 2019-03-21
Supplement: mbc-30-811-s001.pdf [file mbc-30-811-s001.pdf]

# Supplemental Materials

*Molecular Biology of the Cell*

Wang et al.

| Antibody                                           | Dilution for FFPE tissue | Notes                          | Sources                                                               |
|----------------------------------------------------|--------------------------|--------------------------------|-----------------------------------------------------------------------|
| <b>Centrosome markers</b>                          |                          |                                |                                                                       |
| <b>Anti-<math>\gamma</math>-tubulin</b>            | 1:100                    | PCM protein                    | Sigma-Aldrich GTU-88                                                  |
| <b>Anti-Pericentrin</b>                            | 1:200                    | PCM protein                    | Abcam mAbcam 28144                                                    |
| <b>Anti-CEP135</b>                                 | 1:50                     | Centriole proximal-end protein | Abcam ab75005                                                         |
| <b>Anti-Centrin-3</b>                              | 1:100                    | Centriole distal-end protein   | Abnova H00001070-M01                                                  |
| <b>Anti-CP110</b>                                  | 1:100                    | Centriole distal-end protein   | proteintech™ 12780-I-AP                                               |
| <b>Epithelial cell border markers</b>              |                          |                                |                                                                       |
| <b>Anti-E-Cadherin</b>                             | 1:100                    |                                | Abcam ab76055 M168                                                    |
| <b>Anti-CD49f (<math>\alpha 6</math> integrin)</b> | 1:100                    |                                | AA6NT, Cress lab, University of Arizona Cancer Center. <sup>1,2</sup> |
| <b>Others</b>                                      |                          |                                |                                                                       |
| <b>Anti-cMyc</b>                                   | 1:10                     |                                | Cell Signaling Technology D3N8F                                       |

Supplemental Table 1: Antibodies used in this study

- 1 Pawar, S. C., Demetriou, M. C., Nagle, R. B., Bowden, G. T. & Cress, A. E. Integrin  $\alpha 6$  cleavage: a novel modification to modulate cell migration. *Exp Cell Res* **313**, 1080-1089, doi:10.1016/j.yexcr.2007.01.006 (2007).
- 2 Ports, M. O., Nagle, R. B., Pond, G. D. & Cress, A. E. Extracellular engagement of  $\alpha 6$  integrin inhibited urokinase-type plasminogen activator-mediated cleavage and delayed human prostate bone metastasis. *Cancer Res* **69**, 5007-5014, doi:10.1158/0008-5472.CAN-09-0354 (2009).
